# Supplementary material for: Nanotechnology-based diagnostics and therapeutics in acute lymphoblastic leukemia: a systematic review of preclinical studies
Source: PubMed Central journal article supplement — Nanoscale Adv. 2023 Jan 11;5(3):571–95. doi: 10.1039/d2na00483f (PMC9890594; doi:10.1039/d2na00483f), 2023-01-11
Supplement: NA-005-D2NA00483F-s002.pdf [file NA-005-D2NA00483F-s002.pdf]

**Table S1.** Checklist for quality assessment the of the included studies.

| <b>Criteria</b>                                                                | <b>Yes<br/>(2)</b> | <b>Partial<br/>(1)</b> | <b>No<br/>(0)</b> | <b>N/A</b> |
|--------------------------------------------------------------------------------|--------------------|------------------------|-------------------|------------|
| 1- Question/objective adequately defined?                                      |                    |                        |                   |            |
| 2- Proper study design?                                                        |                    |                        |                   |            |
| 3- Clear content for the study?                                                |                    |                        |                   |            |
| 4- Association to a theoretic framework/broader body of science/<br>Knowledge? |                    |                        |                   |            |
| 5- Sufficient nanomaterial characterization?                                   |                    |                        |                   |            |
| 6- Appropriate cellular or animal models of study?                             |                    |                        |                   |            |
| 7- Appropriate in vitro and in vivo controls?                                  |                    |                        |                   |            |
| 8- Appropriate explanation for analytical methods?                             |                    |                        |                   |            |
| 9- Enough details of results reported?                                         |                    |                        |                   |            |
| 10- Supported conclusions by results?                                          |                    |                        |                   |            |

N/A was pointed to criteria not suitable to a study design and were not considered for the summary score calculation. Summary scores were obtained by the scoring of ten criteria for each study, then summing up the total score estimated over ten criteria and dividing by 20 (possible maximum total score).
